# Supplementary material
Source: publisher figshare collection journal article supplement (https://frontiersin.figshare.com/ndownloader/files/22807256)
Supplement: Supplementary file [file 22807256]

## Supplemental Appendix

### Members of the G-CHAMPS Collaborative Group

The G-CHAMPS trial was conducted by Dongzhimen Hospital, Beijing University of Chinese Medicine and implemented in close partnership with Hubei Provincial of Integrated Chinese and Western Medicine, China. In addition to the core writing group, the following study group members also contributed substantively to the conduct of the G-CHAMPS trial. These authors contributed equally to this work. All the authors dedicated large amounts of time to the study, in the hope of improving care for patients during COVID-19 outbreak. All members read and approved the final report. All authors agree, as the G-CHAMPS group members, to submit this article.

These authors contributed equally to this work, and are presented in alphabetical order.

| Name            | Name<br>(Chinese<br>characters) | Degree | Affiliation                                                          | Email                                                          |
|-----------------|---------------------------------|--------|----------------------------------------------------------------------|----------------------------------------------------------------|
| An, Changqing   | 安长青                             | Ph.D   | Hubei Provincial Hospital of Integrated Chinese and Western Medicine | <a href="mailto:2642037775@qq.com">2642037775@qq.com</a>       |
| Chen, Ying      | 陈莹                              | M.D.   | Dongzhimen Hospital, Beijing University of Chinese Medicine          | <a href="mailto:chenying0206@126.com">chenying0206@126.com</a> |
| Dai, Hengheng   | 代恒恒                             | M.D.   | Dongzhimen Hospital, Beijing University of Chinese Medicine          | <a href="mailto:csdy1114@sina.com">csdy1114@sina.com</a>       |
| Du, Jian        | 杜渐                              | M.D.   | Dongzhimen Hospital, Beijing University of Chinese Medicine          | <a href="mailto:dujian8412@126.com">dujian8412@126.com</a>     |
| Geng, Xu        | 耿旭                              | B.S.   | Dongzhimen Hospital, Beijing University of Chinese Medicine          | <a href="mailto:470601647@qq.com">470601647@qq.com</a>         |
| Hao, Xuezheng   | 郝学增                             | M.D.   | Dongzhimen Hospital, Beijing University of Chinese Medicine          | <a href="mailto:haoxuezheng@163.com">haoxuezheng@163.com</a>   |
| He, Weili       | 赫伟丽                             | M.D.   | Dongzhimen Hospital, Beijing University of Chinese Medicine          | <a href="mailto:heweili2004@163.com">heweili2004@163.com</a>   |
| Ji, Chunyan     | 计春燕                             | M.D.   | Hubei Provincial Hospital of Integrated Chinese and Western Medicine | <a href="mailto:574900945@qq.com">574900945@qq.com</a>         |
| Ji, Dongmei     | 纪冬梅                             | B.S.   | Dongzhimen Hospital, Beijing University of Chinese Medicine          | <a href="mailto:460600663@qq.com">460600663@qq.com</a>         |
| Liang, Tengxiao | 梁腾霄                             | Ph.D   | Dongzhimen Hospital, Beijing University of Chinese Medicine          | <a href="mailto:13601133923@163.com">13601133923@163.com</a>   |

| Name            | Name<br>(Chinese<br>characters) | Degree  | Affiliation                                                                                        | Email                                                                    |
|-----------------|---------------------------------|---------|----------------------------------------------------------------------------------------------------|--------------------------------------------------------------------------|
| Liu, Yan        | 刘岩                              | M.D.    | Dongzhimen Hospital, Beijing University of Chinese Medicine                                        | <a href="mailto:sasliu@yeah.net">sasliu@yeah.net</a>                     |
| Shang, Hongcai  | 商洪才                             | Ph.D    | Dongzhimen Hospital, Beijing University of Chinese Medicine                                        | <a href="mailto:shanghongcai@126.com">shanghongcai@126.com</a>           |
| Tian, Guihua    | 田贵华                             | Ph.D    | Dongzhimen Hospital, Beijing University of Chinese Medicine                                        | <a href="mailto:rosetgh@163.com">rosetgh@163.com</a>                     |
| Wang, Tong      | 王彤                              | B.S.    | Dongfang Hospital, Beijing University of Chinese Medicine                                          | <a href="mailto:wdwt388@sina.com">wdwt388@sina.com</a>                   |
| Wang, Xian      | 王显                              | Ph.D    | Dongzhimen Hospital, Beijing University of Chinese Medicine                                        | <a href="mailto:wx650515@163.com">wx650515@163.com</a>                   |
| Wu, Huayang     | 吴华阳                             | Ph.D    | Dongzhimen Hospital, Beijing University of Chinese Medicine                                        | <a href="mailto:wuhuayang2003095@126.com">wuhuayang2003095@126.com</a>   |
| Xia, Wenguang   | 夏文广                             | Ph.D    | Hubei Provincial Hospital of Integrated Chinese and Western Medicine                               | <a href="mailto:docxwg@163.com">docxwg@163.com</a>                       |
| Ye, Yongan      | 叶永安                             | Ph.D    | Dongzhimen Hospital, Beijing University of Chinese Medicine                                        | <a href="mailto:Dzmscholar@163.com">Dzmscholar@163.com</a>               |
| Zhang, Chi      | 张弛                              | Ph.D    | Dongzhimen Hospital, Beijing University of Chinese Medicine                                        | <a href="mailto:saga618@126.com">saga618@126.com</a>                     |
| Zhang, Jingjing | 张晶晶                             | M.D.    | Dongzhimen Hospital, Beijing University of Chinese Medicine                                        | <a href="mailto:zjhzyfy@163.com">zjhzyfy@163.com</a>                     |
| Zhang, Xiaoyu   | 张晓雨                             | Ph.D    | Dongzhimen Hospital, Beijing University of Chinese Medicine                                        | <a href="mailto:zbzhangxiaoyu@aliyun.com">zbzhangxiaoyu@aliyun.com</a>   |
| Zhang, Xuecheng | 张学成                             | M.D.    | Dongzhimen Hospital, Beijing University of Chinese Medicine                                        | <a href="mailto:zhangxuechengmail@163.com">zhangxuechengmail@163.com</a> |
| Zhang, Yaosheng | 张耀圣                             | Ph.D    | Dongzhimen Hospital, Beijing University of Chinese Medicine                                        | <a href="mailto:ysz3129@163.com">ysz3129@163.com</a>                     |
| Zhang, Ziwei    | 张子伟                             | B.S.    | Dongzhimen Hospital, Beijing University of Chinese Medicine                                        | <a href="mailto:15910802923@163.com">15910802923@163.com</a>             |
| Zhou, Kehua     | 周科华                             | MD, DPT | Catholic Health System Internal Medicine Training Program, University at Buffalo, Buffalo, NY, USA | <a href="mailto:kehua-zhou@buffalo.edu">kehua-zhou@buffalo.edu</a>       |

**Manuscript title:** Guideline-based Chinese Herbal Medicine treatment Plus Standard care for severe coronavirus disease 2019 (G-CHAMPS)

**Corresponding author:** Yong-an Ye, PhD, Dongzhimen Hospital, Beijing University of Chinese Medicine.

| Name<br>(姓名汉字) | Name<br>(姓名拼音) | Degree<br>(最高学历) | Affiliation<br>(工作单位)                                                                              | Email<br>(邮箱)            |
|----------------|----------------|------------------|----------------------------------------------------------------------------------------------------|--------------------------|
|                | Shang Hongcai  | Ph.D             | Dongzhimen Hospital, Beijing University of Chinese Medicine                                        | shanghongcai@126.com     |
|                | Liu Yan        | M.D              | Dongzhimen Hospital, Beijing University of Chinese Medicine                                        | sasliu@yeah.net          |
|                | Kehua Zhou     | MD, DPT          | Catholic Health System Internal Medicine Training Program, University at Buffalo, Buffalo, NY, USA | kehuazho@buffalo.edu     |
|                | Zhang Chi      | Ph.D             | Dongzhimen Hospital, Beijing University of Chinese Medicine                                        | saga618@126.com          |
|                | Zhang Xiaoyu   | Ph.D             | Dongzhimen Hospital, Beijing University of Chinese Medicine                                        | zbzhangxiaoyu@aliyun.com |
|                | Liang Tengxiao | Ph.D             | Dongzhimen Hospital, Beijing University of Chinese Medicine                                        | 13601133923@163.com      |

| Name<br>(姓名汉字) | Name<br>(姓名拼音) | Degree<br>(最高学历) | Affiliation<br>(工作单位)                                                | Email<br>(邮箱)         |
|----------------|----------------|------------------|----------------------------------------------------------------------|-----------------------|
|                | Xue-zeng, Hao  | M.D.             | Dongzhimen Hospital, Beijing University of Chinese Medicine          | haoxuezenseng@163.com |
|                | Ji Dongmei     | B.S.             | Dongzhimen Hospital, Beijing University of Chinese Medicine          | 460600663@qq.com      |
|                | Geng Xu        | B.S.             | Dongzhimen Hospital, Beijing University of Chinese Medicine          | 470601647@qq.com      |
|                | Du Jian        | M.D.             | Dongzhimen Hospital, Beijing University of Chinese Medicine          | dujian8412@126.com    |
|                | Zhang zi wei   | B.S.             | Dongzhimen Hospital, Beijing University of Chinese Medicine          | 15910802923@163.com   |
|                | Wang Tong      | B.S.             | Dongfang Hospital, Beijing University of Chinese Medicine            | wdwt388@sina.com      |
|                | An Changqing   | Ph.D             | Hubei Provincial Hospital of Integrated Chinese and Western Medicine | 2642037775@qq.com     |
|                | XIA WENGUANG   | Ph.D             | Hubei Provincial Hospital of Integrated Chinese and Western Medicine | docxwg@163.com        |
|                | Ji Chunyan     | M.D.             | Hubei Provincial Hospital of Integrated Chinese and Western Medicine | 574900945@qq.com      |

| Name<br>(姓名汉字) | Name<br>(姓名拼音)  | Degree<br>(最高学历) | Affiliation<br>(工作单位)                                       | Email<br>(邮箱)             |
|----------------|-----------------|------------------|-------------------------------------------------------------|---------------------------|
| 张耀圣            | zhang yao sheng | Ph.D             | Dongzhimen Hospital, Beijing University of Chinese Medicine | ysz3129@163.com           |
| 王彦             | Wang Yan        | Ph.D             | Dongzhimen Hospital, Beijing University of Chinese Medicine | wx650515@163.com          |
| 叶永安            | ye yongan       | Ph.D             | Dongzhimen Hospital, Beijing University of Chinese Medicine | dzmscholar@163.com        |
| 陈莹             | CHEN YING       | M.D.             | Dongzhimen Hospital, Beijing University of Chinese Medicine | chenying0206@126.com      |
| 张晶晶            | ZHANG JINGJING  | M.D.             | Dongzhimen Hospital, Beijing University of Chinese Medicine | zjhzyfy@163.com           |
| 代恒恒            | DAL HENGHENG    | M.D.             | Dongzhimen Hospital, Beijing University of Chinese Medicine | csdy1114@sina.com         |
| 张学成            | ZHANG XUECHENG  | M.D.             | Dongzhimen Hospital, Beijing University of Chinese Medicine | zhangxuechengmail@163.com |
| 田贵华            | Tian GuiHua     | Ph.D             | Dongzhimen Hospital, Beijing University of Chinese Medicine | rosetgh@163.com           |
